# Supplementary material
Source: PubMed Central journal article supplement (PMC6498342)
Supplement: 12079_2018_493_MOESM1_ESM.pdf [file 12079_2018_493_MOESM1_ESM.pdf]

## Supplementary data:

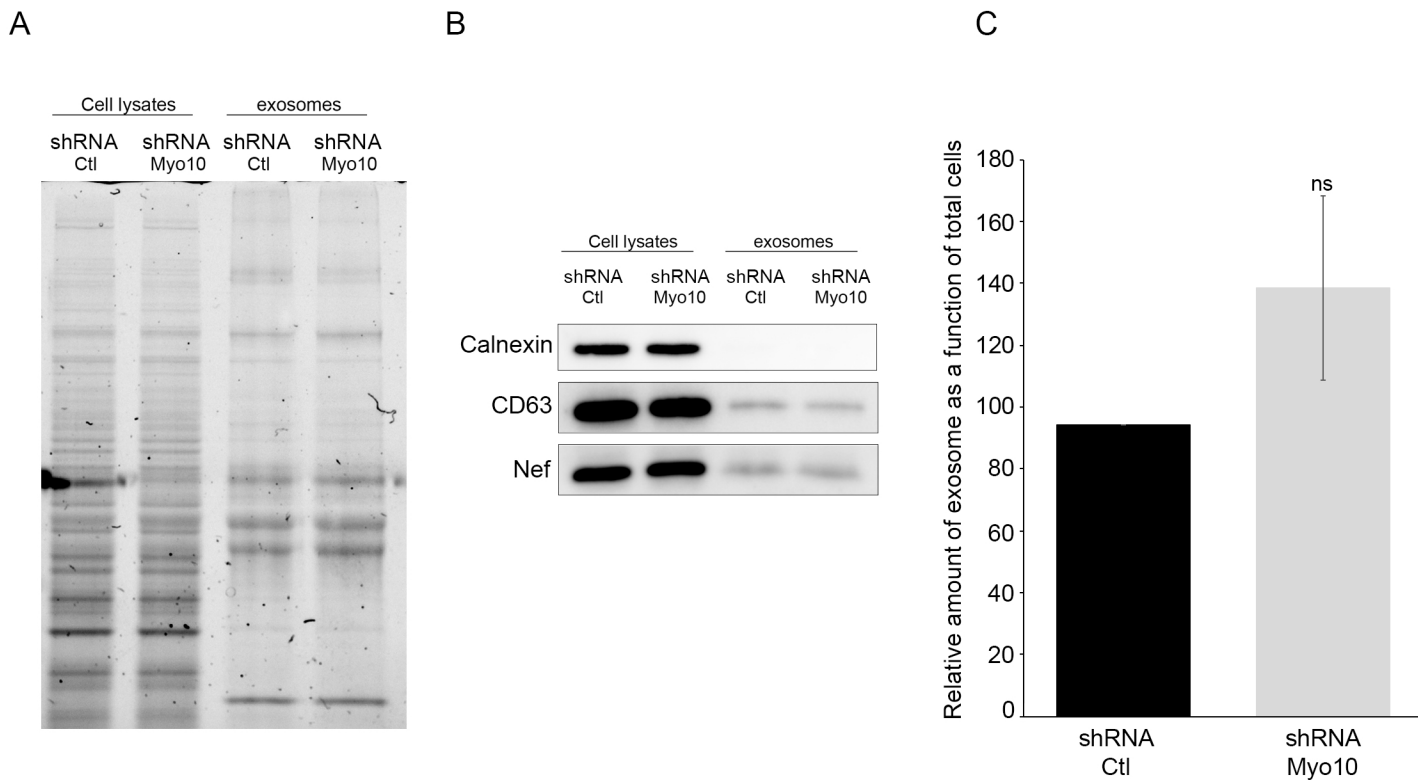

**Supplementary Figure 1: Nef is detected in exosomes after 48 hrs incubation and is not affected by down-regulation of Myo10.** Exosomes from 7,000,000 cells (N5-shRNA control or shRNA Myo10) were isolated after 48 hrs. (A) Stain free gel using 2,2,2-Trichloroethanol (TCE) incorporated into Bis-Tris gels allows for the visualization of all proteins in the sample. (B) Western blot analyses of CD63 (exosome marker), Nef and calnexin are shown. (C) Densitometry representation of the percent of exosomes released as a function of total cell used from (A). Blot is a representative of 3 independent experiments. Graphs show the means (+/- s.e.m), with a P value = 0.03 (not significant = ns). Overall, exosome release and the presence of Nef in exosomes is not affected by the expression levels of Myo10.
